# Supplementary material for: Global health initiative investments and health systems strengthening: a content analysis of global fund investments
Source: Global Health. 2013 Jul 26;9:30. doi: 10.1186/1744-8603-9-30 (PMC3750586; doi:10.1186/1744-8603-9-30)
Supplement: Additional file 1: Table S1 — HSS Funding Assessment Framework (Full). Description: Unabridged version of HSS Funding Assessment Framework. Table S2. Swiss TPH subset of Global Fund Round 8 grants. Description: Details of 52 grants analyzed including; country, region, disease, grant number, budgeted amount for Phase I (USD). Table S3. Distribution of Global Fund Round 8 grants by region. Description: Results of chi-squared analysis for the distribution of Global Fund Round 8 grants by region. Table S4. Distribution of Global Fund Round 8 grants by component. Description: Results of chi-squared analysis for the distribution of Global Fund Round 8 grants by disease component. Table S5. Exclusion / Inclusion criteria for health systems strengthening activities. Description: Full list of exclusion / inclusion criteria used in analysis. Table S6. Euro to USD exchange rates by grant start date. Description: Data for euro (€) to US Dollar ($) conversion including: grant number, grant amount (€), grant start date, daily exchange rate, grant amount ($). [file 1744-8603-9-30-S1.xls]

## Sheet: Annex Table 1
	Annex Table 1. HSS Funding Assessment Framework (Full)
	Building Block	Function	Intervention
	Governance	Capacity building	leadership training
			training on decentralisation
			training on sector integration
		Harmonisation	between donor agendas
			between donor and governmental agendas
			alignment with national strategies
		Sector integration	collaboration between Ministries
			collaboration between Public & Private sectors
			collaboration with civil society
		Decentralisation	decentralisation of management / resource control
			decentralisation of planning
			decentralisation of leadership / ownership
		National Health Strategy development	policy, legal, and regulatory frameworks
			measures to increase accountability / transparency
			ethical conduct
			support / establish regular performance reviews
		Coordination	establishment of national programs
			standardisation of guidelines
	Financing	Maximize social protection	support existing / development of insurance scheme
			subsidise membership or user fees
			support basket funding
		Improve resource effectiveness	use of evidence to plan and budget
			standardise service provider payment methods
			support SWAp scheme
		Patient and/or provider incentives	conditional cash transfers
			pay for performance
			remuneration for geographically isolated service providers
		Financial management transparency
	Information	Health Information Systems Strengthening	design and development of HMIS
			integration of Information and Communication Technology
			standardisation / rationalisation of indicators
			harmonisation with national HIS
			training and / or compensation of staff
			M & E strengthening
		Strategies to increase evidence-based planning	routine HMIS / M & E
			operational research
			development of national health accounts
			burden of disease data collection
		Increase accessibility of information	use of specialists to translate data to policy-makers
			introduction of electronic record systems
			use of mass media to disseminate routine health information to public
			increase access to information technology
			IEC
	Human Resources	Support for pre-service training	support for training institutions
			update of curricula
			scholarships
			recruitment
		Support for in-service health workforce	continuing education / on-the-job training
			task shifting
			support for referral system
			posting allowances / appropriate distribution
			provision of support staff
			improvement of feedback and supervision
			leadership & management capacity building
	Medicines and Technology	Support for rational use of essential medicines	standardisation of guidelines & lists of essential medicines / technology
			implement strategies to assure adherence
			patient education
		Improve management of essential medicines	strengthen procurement systems
			strengthen SCM systems
			improve management of dispensaries
			equip central and regional medicine depots
		Affordable, quality Essential Drugs Programme	inc availability of information on drug prices and capacity to negotiate
			regulation of international trade agreements
			quality assessment of high-priority products
		Health service supplies (non-consumables)	provision / maintenance of equipment
			provision / maintenance of technology
			provision / maintenance of hardware / software
	Service Delivery	Infrastructure	provision of utilities
			provision / maintenance of transportation
			maintenance of storage facilities
			support of waste management systems
			maintenance of institutions / dispensaries
			provision of furniture
			capital construction
		Measures to increase coverage - supply	standardisation of care
			integration of services
			support for referral system
		Measures to increase coverage - demand	community outreach / home-based services
			alignment of services with cultural norms / values
			social marketing to increase awareness
			strengthening emergency services
			strengthening laboratory services
		HIS -	health information system
		HMIS -	health management information system
		IEC -	information, education, communication
		M&E -	monitoring and evaluation
		SCM -	supply chain management

## Sheet: Annex Table 2
	Annex Table 2. Swiss TPH sub-set of Global Fund Round 8 grants
	Country	Region	Disease	Grant Nr.	Budgeted Amount Phase I (USD)
	Afghanistan	South Asia	TB	AFG-809-G07-T	10,528,378.06*
	Afghanistan	South Asia	Malaria	AFG-809-G08-M	7,052,637.32*
	Afghanistan	South Asia	Malaria	AFG-809-G09-M	32,960,064.88*
	Bangladesh	South Asia	TB	BAN-809-G10-T	2826555
	Brazil	Latin America & the Caribbean	Malaria	BRA-809-G03-M	8,135,663.91*
	Brazil	Latin America & the Caribbean	Malaria	BRA-809-G04-M	17,586,496.64*
	Bulgaria	Eastern Europe & Central Asia	TB	BUL-809-G03-T	4,439,844.99*
	China	East Asia & the Pacific	TB	CHN-809-G12-T	28,917,475.18*
	Eritrea	Sub-Saharan Africa: East Africa	HIV/AIDS	ERT-809-G06-H	15174249
	Ethiopia	Sub-Saharan Africa: East Africa	Malaria	ETH-809-G10-M	133089526
	Ghana	Sub-Saharan Africa: West & Central Africa	Malaria	GHN-809-G07-M	5354752
	Ghana	Sub-Saharan Africa: West & Central Africa	Malaria	GHN-809-G08-M	30500500
	Ghana	Sub-Saharan Africa: West & Central Africa	HIV/AIDS	GHN-809-G09-H	4746831
	Ghana	Sub-Saharan Africa: West & Central Africa	HIV/AIDS	GHN-809-G10-H	2835231
	Ghana	Sub-Saharan Africa: West & Central Africa	HIV/AIDS	GHN-809-G11-H	27994442
	Ghana	Sub-Saharan Africa: West & Central Africa	HIV/AIDS	GHN-809-G12-H	13774466
	Kazakhstan	Eastern Europe & Central Asia	TB	KAZ-809-G04-T	30329313
	Lao (PDR)	East Asia & the Pacific	HIV/AIDS	LAO-809-G11-H	16396785
	Liberia	Sub-Saharan Africa: West & Central Africa	HIV/AIDS	LBR-810-G07-H	32809911
	Lesotho	Sub-Saharan Africa: Southern Africa	HIV/AIDS	LSO-809-G07-H	6821386
	Moldova	Eastern Europe & Central Asia	TB	MOL-809-G04-T	5,014,995.28*
	Moldova	Eastern Europe & Central Asia	TB	MOL-809-G05-T	1,558,064.33*
	Moldova	Eastern Europe & Central Asia	HIV/AIDS	MOL-809-G06-H	10,232,388.76*
	Mozambique	Sub-Saharan Africa: Southern Africa	HIV/AIDS	MOZ-809-G08-S	11823414
	Mauritius	Sub-Saharan Africa: East Africa	HIV/AIDS	MUS-809-G01-H	3,225,359.13*
	Mauritius	Sub-Saharan Africa: East Africa	HIV/AIDS	MUS-809-G02-H	1,992,595.09*
	Nigeria	Sub-Saharan Africa: West & Central Africa	HIV/AIDS	NGA-809-G12-S	55379935
	Nigeria	Sub-Saharan Africa: West & Central Africa	Malaria	NGA-809-G14-M	101526897
	Pakistan	South Asia	TB	PKS-809-G09-T	5684019
	Pakistan	South Asia	TB	PKS-809-G10-T	3183623
	Papua New Guinea	East Asia & the Pacific	Malaria	PNG-809-G04-M	20949246
	Papua New Guinea	East Asia & the Pacific	Malaria	PNG-809-G05-M	6373170
	Papua New Guinea	East Asia & the Pacific	Malaria	PNG-809-G06-M	23112615
	Rwanda	Sub-Saharan Africa: East Africa	Malaria	RWN-809-G10-M	52835617
	Serbia	Eastern Europe & Central Asia	HIV/AIDS	SER-809-G04-H	2,211,243.35*
	Serbia	Eastern Europe & Central Asia	HIV/AIDS	SER-809-G05-H	2,977,690.49*
	Solomon Islands	East Asia & the Pacific	TB	SLB-810-G01-T	3962489
	Somalia	North Africa & the Middle East	HIV/AIDS	SOM-809-G06-H	23962544
	Sri Lanka	South Asia	Malaria	SRL-809-G10-M	10437817
	Sri Lanka	South Asia	Malaria	SRL-809-G12-M	5970720
	Sudan	North Africa & the Middle East	TB	SUD-809-G12-T	15499514
	Swaziland	Sub-Saharan Africa: Southern Africa	Malaria	SWZ-809-G06-M	5051555
	Swaziland	Sub-Saharan Africa: Southern Africa	TB	SWZ-809-G07-T	4163873
	Swaziland	Sub-Saharan Africa: Southern Africa	HIV/AIDS	SWZ-809-G08-S	7173715
	Tajikistan	Eastern Europe & Central Asia	HIV/AIDS	TAJ-809-G07-H	20028140
	Tajikistan	Eastern Europe & Central Asia	Malaria	TAJ-809-G08-M	5,478,594.97*
	Tajikistan	Eastern Europe & Central Asia	TB	TAJ-809-G09-T	20609574
	Thailand	East Asia & the Pacific	HIV/AIDS	THA-809-G10-H	16863815
	Thailand	East Asia & the Pacific	HIV/AIDS	THA-809-G12-H	8.97964e+06
	Zambia	Sub-Saharan Africa: Southern Africa	HIV/AIDS	ZAM-809-G23-H	13777956
	Zimbabwe	Sub-Saharan Africa: Southern Africa	HIV/AIDS	ZIM-809-G11-H	84641215
	Zimbabwe	Sub-Saharan Africa: Southern Africa	TB	ZIM-809-G12-T	28236113
	* Original grant agreements signed in the Euro (€) were converted to USD with exchange rates listed in Annex Table 6. (http://www.ecb.int/stats/exchange/eurofxref/html/eurofxref-graph-usd.en.htm). The grants highlighted in bold are those that were dedicated to HSS.

## Sheet: Annex Table 3
	Annex Table 3. Distribution of Global Fund Round 8 grants by region
		N = 139				N = 52
		n	%	95% C.I.		n	%	95% C.I.		p-value
	Eastern Europe & Central Asia	16	11.5108	6.7 - 18.0		10	19.2308	9.6 - 32.5		0.166
	South & West Asia	12	8.63309	4.5 - 14.6		8	15.3846	6.9 - 28.1		0.175
	East Asia & the Pacific	21	15.1079	9.6 - 22.2		8	15.3846	6.9 - 28.1		0.962
	Latin America & the Caribbean	14	10.0719	5.6 - 16.3		2	3.84615	0.5 - 13.2		0.167
	North Africa & the Middle East	10	7.19424	3.5 - 12.8		2	3.84615	0.5 - 13.2		0.396
	West & Central Africa	31	22.3022	15.7 - 30.1		9	17.3077	8.2 - 30.3		0.45
	East Africa	22	15.8273	10.2 - 23.0		5	9.61538	3.2 - 21.0		0.273
	Southern Africa	13	9.35252	5.1 - 15.5		8	15.3846	6.9 - 28.1		0.236
	*p-values calculated using the chi-squared test

## Sheet: Annex Table 4
	Annex Table 4. Distribution of Global Fund Round 8 grants by component
		N = 139				N = 52
		n	%	95% C.I.		n	%	95% C.I.		p-value
	HIV/AIDS	52	37.4101	29.4 - 46.0		19	36.5385	23.6 - 51.0		0.912
	TB	34	24.4604	17.6 - 32.5		14	26.9231	15.6 - 41.0		0.727
	Malaria	46	33.0935	25.4 - 41.6		16	30.7692	18.7 - 45.1		0.76
	HSS	7	5.03597	2.0 - 10.1		3	5.76923	1.2 - 15.9		0.84
	*p-values calculated using the chi-squared test. The 7 HSS grants in Round 8 were awarded to Armenia, Guinea-Bissau, Guyana, Zimbabwe, Mozambique, Nigeria, and Swaziland (the last three were analyzed with the HSS Framework).

## Sheet: Annex Table 5
	Annex Table 5. Exclusion / Inclusion criteria for health systems strengethening activities
	Excluded	Included (intervention)
	-Funding for other NGOs	-Printing & disseminating guidelines (routine HMIS)
	-Salaries, per diems, etc.	-Routine M&E (routine HMIS)
	-Overheads (ex. PSI fees)	-Assessment of facilities, capacity, etc. (routine HMIS)
	-Meetings, conferences*	-Training materials (continuing education)
	-Delivery of services	-Auditing (routine HMIS)
	-PR costs	-Community mobilisation (collaboration with civil society)
	-Rent, warehousing costs, etc.	-DOTS (measure to assure adherence → "disease-specific")
	-Training of social workers, police officers, etc.	-Per diems, fuel, etc. when part of training, etc.
	-Technical assistance ("salaries")
	-Support for ex-pat healthcare providers
	-Ongoing operating costs
	-Indoor Residual Spraying**
	-Support for mass campaigns
	-Insurance of vehicles
	-Prevention activities
	-Incentives for patients framed as patient support
	*unless the meeting / workshop is dedicated to an HSS topic
	**except social marketing → "disease-specific"
	DOTS -	Directly-observed Treatment, short-term
	M&E -	monitoring and evaluation
	NGOs -	non-governmental organizations
	PR -	Principal Recipient
	PSI -	Procurement Solutions International

## Sheet: Annex Table 6
	Annex Table 6. Exchange rate data
	Grant Nr.	Grant Amount (€)	Start date	Exchange Rate	Grant Amount ($)
	AFG-809-G07-T	7.24147e+06	2009-10-01	1.4539	1.05284e+07
	AFG-809-G08-M	4774328	2009-11-01	1.4772	7.05264e+06
	AFG-809-G09-M	22312527	2009-11-01	1.4772	3.29601e+07
	BRA-809-G03-M	5397150	2009-12-01	1.5074	8.13566e+06
	BRA-809-G04-M	11666775	2009-12-01	1.5074	1.75865e+07
	BUL-809-G03-T	3282695	2010-03-01	1.3525	4.43984e+06
	CHN-809-G12-T	1.98896e+07	2009-10-01	1.4539	2.89175e+07
	MOL-809-G04-T	3.44934e+06	2009-10-01	1.4539	5.015e+06
	MOL-809-G05-T	1.14471e+06	2010-10-01	1.3611	1.55806e+06
	MOL-809-G06-H	7102866	2010-01-01	1.4406	1.02324e+07
	MUS-809-G01-H	2.2389e+06	2010-01-01	1.4406	3.22536e+06
	MUS-809-G02-H	1.38317e+06	2010-01-01	1.4406	1.9926e+06
	SER-809-G04-H	1.5687e+06	2009-07-01	1.4096	2.21124e+06
	SER-809-G05-H	2.11244e+06	2009-07-01	1.4096	2.97769e+06
	TAJ-809-G08-M	3.76821e+06	2009-10-01	1.4539	5.47859e+06
	http://www.ecb.int/stats/exchange/eurofxref/html/eurofxref-graph-usd.en.html
